1 **Slower environmental change hinders adaptation from standing genetic**  
2 **variation**

3 Thiago S. Guzella<sup>1,\*</sup>, Snigdhadip Dey<sup>1</sup>, Ivo M. Chelo<sup>2</sup>, Ania Pino-Querido<sup>2</sup>, Veronica F.  
4 Pereira<sup>1</sup>, Stephen R. Proulx<sup>3</sup>, Henrique Teotónio<sup>1,\*</sup>

5 <sup>1</sup> Institut de Biologie de l' École Normale Supérieure (IBENS), École Normale Supérieure,  
6 CNRS, Inserm, PSL Research University, F-75005 Paris, France.

7 <sup>2</sup> Instituto Gulbenkian de Ciência, Oeiras P-27801-901, Portugal.

8 <sup>3</sup> Department of Ecology, Evolution, and Marine Biology, University of California Santa  
9 Barbara, CA 93106, U.S.A.

10 \* Correspondence to: [tguzella@tguzella.org](mailto:tguzella@tguzella.org), [teotonio@biologie.ens.fr](mailto:teotonio@biologie.ens.fr)

11

12 *Draft version: 15 October 2017*

## 13 **Abstract**

14           Evolutionary responses to environmental change depend on the time available for  
15 adaptation before environmental degradation leads to extinction. Explicit tests of this  
16 relationship are limited to microbes where adaptation depends on the order of mutation  
17 accumulation, excluding standing genetic variation which is key for most natural species.  
18 When adaptation is determined by the amount of heritable genotype-by-environment fitness  
19 variance then genetic drift and/or maintenance of similarly fit genotypes may deter  
20 adaptation to slower the environmental changes. To address this hypothesis, we perform  
21 experimental evolution with self-fertilizing populations of the nematode *Caenorhabditis*  
22 *elegans* and develop a new inference model that follows pre-existing genotypes to describe  
23 natural selection in changing environments. Under an abrupt change, we find that selection  
24 rapidly increases the frequency of genotypes with high fitness in the most extreme  
25 environment. In contrast, under slower environmental change selection favors those  
26 genotypes that are worse at the most extreme environment. We further demonstrate with a  
27 second set of evolution experiments that, as a consequence of slower environmental  
28 change, population bottlenecks and small population sizes lead to the loss of beneficial  
29 genotypes, while maintenance of polymorphism impedes their fixation in large populations.  
30 Taken together, these results indicate that standing variation for genotype-by-environment  
31 fitness interactions alters the pace and outcome of adaptation under environmental change.

32

33 *Keywords:* Standing genetic variation, GxE fitness interactions, environmental change,  
34 population genomics, experimental evolution, selfing, *C. elegans*

35

## 36 **Introduction**

37           With human activities predicted to increase rates of climate change (Stocker et al.  
38 2013), it has become urgent to pinpoint the ecological and evolutionary conditions by  
39 which natural populations survive and adapt at different rates of environmental change. It is  
40 generally accepted that low rates of environmental change allow more time for new  
41 beneficial mutations to appear and, consequently, to promote adaptation and to rescue  
42 populations from extinction (Lynch and Lande 1993, Kopp and Hermisson 2009, Lande  
43 2009, Chevin et al. 2010). Experimental evolution results from studies of with microbes  
44 support this idea (Perron et al. 2008, Collins and de Meaux 2009, Bell and Gonzalez 2011,  
45 Gorter et al. 2015), with one study in particular having found that population survival and  
46 adaptation depend on the order of mutation accumulation and epistasis for fitness (Lindsey  
47 et al. 2013). However, most species in nature have small populations, are genetically  
48 structured by geography or reproduction system, have long generation times and/or are  
49 unable to migrate to their favored habitats. In all these cases, survival and adaptation to  
50 changing environments will depend on pre-existing genetic diversity, and less so on  
51 mutation accumulation (Hill 1982, Matuszewski et al. 2015).

52           Adaptation to changing environments from pre-existing genetic diversity is  
53 conditional on how each genotype performs within the environments that may be  
54 encountered in the near future (Fig. 1A). Depending on the shape of these “fitness reaction  
55 norms” (Chevin et al. 2010, Walsh and Lynch 2014, Gorter et al. 2015), and evolutionary  
56 history (Lande 2009, Gonzalez and Bell 2013), natural selection may initially favor  
57 genotypes at intermediate stressing environments that are not necessarily the best at the  
58 more extreme environments. Short-term adaptation will therefore be determined by the

59 amount of heritable genotype-by-environment fitness variance. Two predictions arise from  
60 this hypothesis. The first is that slower environmental change can restrict adaptation  
61 because all populations are finite and the best genotypes may be lost by genetic drift (Crow  
62 and Kimura 1970). The second prediction is that slower environmental change can limit  
63 adaptation by favoring the maintenance of similarly fit genotypes for longer periods,  
64 leading to a reduction in the mean population fitness and weaker selection for the genotypes  
65 with the highest fitness in the most extreme environments (Fisher 1930). Whether or not an  
66 adapting population has standing genetic diversity will profoundly affect the tempo and  
67 mode of evolution in changing environments (Matuszewski et al. 2015).

68         Here we show that heritable genotype-by-environment fitness variance is crucial for  
69 short-term adaptation under different rates of environmental change and illustrate the  
70 several population genetic mechanisms by which slower environmental change retards  
71 adaptation. To this end we performed experimental evolution at different rates of  
72 environmental change, using populations of the nematode *Caenorhabditis elegans* with  
73 standing genetic diversity where individuals can only reproduce by self-fertilization (Fig.  
74 1B). At several time periods during experimental evolution we collected genome-wide  
75 single-nucleotide polymorphism (SNP) data at the individual level. We used these data,  
76 along with fitness data on the ancestral population, to develop a new inference model to  
77 understand the population genetics of adaptation to changing environments from standing  
78 genetic diversity.

79

80

## 81 **Results and Discussion**

### 82 **Experimental evolution in changing environments**

83           We performed replicated experimental evolution for 50 generations in the nematode  
84 *C. elegans* under different rates of change in the NaCl (salt) concentration that individuals  
85 experience from early larvae to adulthood (Fig. 1B and Table S1). In one regime,  
86 populations were suddenly placed in high salt concentration conditions (305 mM NaCl)  
87 while in another regime populations faced gradually increasing salt concentrations (see  
88 Materials and Methods). For the sudden regime, 4 replicate populations undergoing  
89 independent evolution were followed, while for the gradual regime we followed 7 replicate  
90 populations. All these populations are ultimately derived from a lab adapted ancestor  
91 population that has abundant genetic diversity (Chelo and Teotónio 2013, Noble et al. In  
92 Press), but where individuals reproduce exclusively by selfing and are expected to be  
93 homozygous at all loci throughout the genome (Crow and Kimura 1970, Theologidis et al.  
94 2014). Except for salt concentrations, the same life-cycle of discrete and non-overlapping  
95 generations at stable census population sizes of  $10^4$  individuals at the time of reproduction  
96 were maintained as during lab adaptation (see Materials and Methods). A control regime  
97 with 3 replicate populations was also maintained at the 25 mM NaCl conditions of lab  
98 adaptation. Given self-fertilization, the population sizes employed and the time span of  
99 experimental evolution neither mutation accumulation nor selection on new recombinants  
100 should contribute much to adaptation (Matuszewski et al. 2015, Teotónio et al. 2017).

101

102

### 103 **Modeling selection in changing environments**

104           The fitness reaction norms are the key variables for predicting the evolutionary  
105 dynamics and the eventual outcome of adaptation in changing environments (Chevin et al.  
106 2010) [Fig. 1A; see also chapter 44 in (Walsh and Lynch 2014)]. However, since fitness  
107 reaction norms are not directly available, one must resort to estimating them from the  
108 fitness and genotype data that we collected (see Materials and Methods; full inference  
109 model details in Supplementary Information). The data consist of individual-based biallelic  
110 SNP genotypes obtained at 3 time-points for each replicate population (Fig. 1B and Fig.  
111 S1), together with SNP genotypes and fitness data for the ancestral population. Our  
112 approach for modeling accounts for the genotyping setup, in which each individual was  
113 genotyped only in a pair of chromosomes (*C. elegans* is diploid with six chromosomes, for  
114 a genome size of 100 Mbp).

115           During experimental evolution, reproduction occurs exclusively by selfing, and so  
116 our model relies on effectively asexual population genetics dynamics. We consider  
117 deterministic environmental and population genetic dynamics, with discrete non-  
118 overlapping generations and viability selection. The environment faced in a given  
119 generation is represented by an environmental “value”,  $x$ , corresponding to the NaCl  
120 concentration. The population is composed of  $G$  selfing lineages, and we refer to the fitness  
121 reaction norm for a lineage  $k$  as  $\lambda_k(x)$ , corresponding to the expected number of live  
122 offspring produced under environment  $x$  (Fig. 1A). Each lineage is defined by a  
123 combination of haplotypes, based on the SNPs that were genotyped (Figs. S2 and S3).  
124 Inference is performed first by sampling the ancestral population (the lineages present and  
125 their starting frequencies), given the genotyping data, and then estimating the lineage

126 reaction norms, repeating these two steps multiple times to obtain estimates of the reaction  
127 norm parameters. To estimate the lineage reaction norms, we assume they follow a specific  
128 parametric function of the environmental value, and then estimate the resulting parameters:  
129 here we consider  $\log(\lambda_k(x))$  to be linear or quadratic functions of  $x$ .

130

### 131 **Experimental population genetics**

132         Based on the genotyping data collected, we estimate that more than 200 distinct  
133 lineages are present in the lab adapted ancestral population (Fig. S2). The overwhelming  
134 majority of haplotypes observed are quickly selected against under all experimental  
135 evolution regimes (Fig. 2A and Fig. S4). We further find that populations faced with a  
136 sudden change in the first generation followed by constant high salt (305 mM NaCl) show  
137 for each region of the genome a single haplotype sweeping and nearing fixation by  
138 generation 50. In contrast, populations faced with a gradual increase in salt until generation  
139 35 showed a different haplotype initially sweeping but then reverting in frequency when  
140 they were kept in the target high salt environment for another 15 generations.

141         We initially modeled linear fitness reaction norms. The results indicate that the  
142 observed haplotype dynamics are consistent with a single lineage sweeping through the  
143 sudden populations (Figs. 2B, S4 and S5), which we name L28 (see below). Conversely,  
144 the gradual populations had an initial sweep of another lineage (L11), but then started to be  
145 overtaken by L28 by the end of the experiment. When modeling quadratic fitness reaction  
146 norms, the same conclusions are reached regarding haplotype and lineage dynamics (Fig.  
147 S6).

## 148 **Genotype-by-environment fitness interactions**

149           Using whole-genome sequencing data on 100 lines derived from two gradual  
150 populations at generation 50 [from (Noble et al. In Press)], we identified the lines  
151 corresponding to the L28 and L11 lineages that we inferred (Fig S7 and Table S2). Our  
152 model predicts that the fitness reaction norms of these two lineages cross between 200-250  
153 mM NaCl (Figs. 3A and S6C). To test this prediction, we directly assayed the fitness  
154 reaction norms of the ancestral population and the L28 and L11 lines. We find that the  
155 ancestral population fitness falls in-between those of the two lines at each salt level (Fig.  
156 3B), and we find a close qualitative agreement with the model fit in that the line fitness  
157 reaction norms cross at about 225 mM (Fig. 3C). We also conducted head-to-head  
158 competitive fitness assays between L28 and L11, to account for any possible interactions  
159 that might not be apparent in the individual line growth assays. In these competition assays,  
160 performed for 2 generations, both lines were initially placed at 50:50 ratios. The results are  
161 remarkably similar to those under non-competitive conditions (Fig. 3D), indicating that  
162 interactions between the two lines are not significant.

163

## 164 **Assessing how gradual environmental change affects adaptation to high salt**

165           So far, our experiments and assays show that adaptation under different rates of  
166 environmental change is determined by the genotype-by-environment fitness variance  
167 present in the ancestral population. We next investigate the population genetic mechanisms  
168 by which this fitness variance can affect adaptation under slower environmental change.



169           We revived frozen stocks from the seven gradual populations at generation 35, the  
170 generation at which they reached the target high salt environment, and performed a new set  
171 of evolution experiments at two different population size regimes,  $10^4$  and  $2 \cdot 10^3$ , for 30  
172 generations in constant high salt (Fig. 4A and Table S1). In this second set of experiments,  
173 we refer to each of the seven gradual populations as ancestrals. Two main factors, founder  
174 (bottleneck) effects and selection efficiency, could lead to differences in the evolutionary  
175 responses observed from each of the 7 new ancestral populations as well as between  
176 population size regimes. First, the best high salt lineage that we determined from the first  
177 set of evolution experiments, L28, was maintained at low frequencies during gradual  
178 evolution (Fig. 2B) and may have been lost before the second set of experiments started.  
179 The freezing and reviving process could also have resulted in L28 loss. If the L28 lineage  
180 was lost then future adaptation to high salt is compromised. The second factor is that the  
181 efficacy of natural selection on the best lineages may be lower because of increased genetic  
182 drift in small populations (Crow and Kimura 1970) or because of the maintenance of  
183 polymorphism in large populations (Fisher 1930), both mechanisms leading to lower  
184 selection efficiency.

185

### 186 **Genetic drift and selection efficiency**

187           In two time points during this second set of evolution experiments, we genotyped a  
188 number of SNPs in pools of individuals, chosen to maximize the ability to distinguish  
189 lineage L28 (see Materials and Methods). We found that the evolutionary responses of the  
190 populations from the 7 ancestrals fell into three distinct categories.

191           The first category included two ancestral populations (Fig. 4B). From the first  
192    ancestral, it is clear that in large population sizes the L28 lineage swept and likely fixed,  
193    while at smaller population sizes the response was more constrained (Fig. 4B, and Figs. S8-  
194    S10). Despite population size differences, all populations derived from the second ancestral  
195    showed rapid sweeping of L28, indicating that L28 was initially at a high frequency. When  
196    comparing responses in this first category, we conclude that there was a founder effect, in  
197    that L28 was present at different initial frequencies, and that selection was more efficient  
198    when L28 was initially at high frequency and when evolution in high salt occurred at large  
199    population sizes.

200           In the second category, corresponding to three ancestrals, the L28 lineage was most  
201    likely lost before the second set of experiments (Fig. 4C). Strikingly, in ancestrals 3 and 4,  
202    another lineage, distinct from L28, swept more rapidly in large population sizes than in  
203    small population sizes, indicating again higher selection efficiency at larger population  
204    sizes. For the fifth ancestral, we can only conclude that the L28 lineage was lost before the  
205    second set of experiments.

206           Large population sizes are not, however, an assurance of higher adaptive rates in the  
207    high salt environment, as illustrated by the third category, consisting of two ancestrals (Fig.  
208    4D). From them, we observed that the L28 lineage swept in a fraction of the populations,  
209    but exclusively in those with small population sizes. These results are consistent with a  
210    founder effect, in that initial evolution under the gradual regime maintained lineages that  
211    were either almost as fit as the L28 lineage (diminishing selection efficacy on L28), or that  
212    there was frequency-dependence between L28 and other lineages, e.g., (Chelo et al. 2013).  
213    Either way, some of the small populations must have lost these other competitive lineages

214 (or maintained them at very low frequencies), before the second set of experiments, for the  
215 L28 lineage to sweep in them.

216

## 217 **Conclusions**

218         The first set of experiments under different rates of environmental change  
219 demonstrates that adaptation depends on standing genotype-by-environment fitness  
220 variance (Figs. 1 and 2). This is a result that has been previously hinted in microbial  
221 evolution experiments that depended on mutation accumulation for adaptation (Lindsey et  
222 al. 2013, Gorter et al. 2015). Contrary to adaptation from pre-existing genetic diversity,  
223 however, when evolution occurs by the sequential fixation of mutations (and at the large  
224 population sizes usually employed in microbial evolution experiments), diminishing-returns  
225 epistasis for fitness appears to be involved for long-term adaptive dynamics to be predicted  
226 from short-term adaptive dynamics. In particular, short-term evolution must involve a  
227 sufficient number of generations so that adaptive gains become smaller with each new  
228 mutational event. Consistent with this scenario that diminishing-return epistasis for fitness  
229 makes evolution predictable, in constant environments, one yeast evolution experiment  
230 found a high degree of contingency in which specific mutations were sequentially fixed but  
231 not on how they interacted with each other at the fitness level (Kryazhimskiy et al. 2014).

232         Mutation accumulation experiments show that slower environmental changes allows  
233 more time for the exploration of mutational space and the possibility to fix mutations at  
234 intermediate environments that predispose subsequent fixation of additional epistatic  
235 mutations at more extreme environments. In (Gorter et al. 2015), under some stressors,  
236 slow environmental change retarded adaptation but not the fitness gains in the most

237 extreme environments, and in (Lindsey et al. 2013) the populations that survived a sudden  
238 environmental change had higher fitness than those that survived a more gradual change,  
239 suggesting, just as in our experiments from standing genetic diversity, a key role of  
240 genotype-by-environment fitness interactions. Some authors refer to this phenomenon as  
241 “environmental epistasis” since the non-additive fitness interactions between fixed  
242 mutations are themselves environmentally-dependent (Remold and Lenski 2004). With  
243 standing genetic variation, we showed that genotype-by-environment fitness interactions  
244 are sufficient to explain adaptive dynamics, independently of non-additive interactions  
245 between competing genotypes, such as, in our case, negative frequency-dependence (Fig.  
246 3). The emerging picture is that genotype-by-environment fitness interactions are critical  
247 for adaptation to changing environments when evolution occurs from standing genetic  
248 diversity, and that both genotype-by-environment interactions and epistasis are important  
249 when evolution occurs from mutation.

250 Little theoretical work has focused on understanding the population genetics of  
251 adaptation from pre-existing genetic diversity. An exception is the study by Matuszewski  
252 and colleagues (Matuszewski et al. 2015), which explored the distribution of fitness effects  
253 of fixed alleles starting from standing variation under a moving trait under stabilizing  
254 selection. They found that populations facing a fast environmental change show larger trait  
255 changes than those facing a slow environmental change, due to increases in both the  
256 expected number of fixations and the expected trait effect per allele substitution. Although  
257 they did not analyze situations of complete linkage, as in our evolution experiments, they  
258 nonetheless predicted a higher number of fixations under faster environmental change, and  
259 that adaptation would be deterred under slower environmental changes. We found with the

260 continued evolution experiments in high salt that slower environmental change will indeed  
261 maintain polymorphism (Fig. 2) and compromise adaptation (Fig. 4). This is because small  
262 population sizes and bottlenecks reduce the efficacy of selection on the best genotypes,  
263 and/or promote their loss, and the maintenance of polymorphism for long periods in large  
264 populations reduces the likelihood of the single best genotype becoming fixed. Besides  
265 being remarkably consistent with the predictions of (Matuszewski et al. 2015), these  
266 findings confirm classical theory on the role of genetic drift in the loss of adaptive diversity  
267 and on the role of standing genetic variation in reducing mean population fitness (Fisher  
268 1930, Crow and Kimura 1970). They also indicate that long-term adaptation (say, for 100  
269 generations, as in our model in Fig. 2B) cannot be readily predicted from short-term  
270 adaptation (say, from the first 35 generations, as in our first set of experiments). Except in  
271 the most contrived cases where the identity and relative frequency of ancestral genotypes is  
272 known *a priori* because of being constructed, e.g., (Gresham et al. 2011), long-term  
273 adaptation to changing environments in natural populations is not likely to be well  
274 predicted from short-term adaptation; but see (Charmantier et al. 2008).

275         From an empirical perspective, the inference model that we developed here, where  
276 only partial information about the short-term evolutionary trajectories of fitness and genetic  
277 diversity is used, is a significant step in understanding evolution in changing environments.  
278 Using our approach, for natural populations, partial genomic and fitness observations may  
279 allow predicting adaptation to changing environments and, possibly, the likelihood of  
280 extinction. Although most natural species are sexual and thus recombination of pre-existing  
281 diversity could play a role in adaptation to changing environments, it is unlikely that new  
282 recombinants will contribute much given the limited population sizes of most species, and

283 the short time spans of environmental change relative to their generation times, but see,  
284 e.g., (Aggarwal et al. 2015). Related modeling approaches to ours have been proposed to  
285 predict, for example, the within-host evolution of influenza from single infection events  
286 (Illingworth et al. 2014). In our case, we add the possibility for environmental change. In  
287 the agricultural literature similar approaches have also been devised to predict plant yield  
288 and animal production in several environments, but either the environment is modeled as  
289 discrete or linear fitness reaction norms are usually considered, and it is still unclear how to  
290 best model the heritability of fitness from genomic data, cf. (Gomulkiewicz and Kirkpatrick  
291 1992, Walsh and Lynch 2014). Including stochasticity in the population genetics and  
292 recombination would improve our method and allow explicit predictions of the loss of  
293 genetic variance in the fitness reaction norms under gradual environmental change.

## 294 **Materials and Methods**

295 Detailed materials and methods can be found in the Supplementary Information file.

296

## 297 **Experimental evolution in changing environments**

298 All populations employed are ultimately derived from a hybrid population of 16  
299 wild isolates (Teotónio et al. 2012), followed by 140 generations of laboratory  
300 domestication to a 4-day non-overlapping life-cycle under partial self-fertilization (selfing)  
301 at census sizes of  $N = 10^4$  (Teotónio et al. 2012, Chelo et al. 2013), and finally  
302 introgression and homozygosity of the *xol-1(tm3055)* sex determination mutant allele at  
303 high populations sizes for 16 generations to generate an ancestral population only capable  
304 of reproduction by selfing (Theologidis et al. 2014). For experimental evolution in  
305 changing environments (Fig. 1B), ancestral population samples were thawed, expanded in  
306 numbers and first larval staged (L1s) seeded at the appropriate densities to three regimes.  
307 The sudden regime was characterized by the same conditions to which previous lab-  
308 adaptation occurred, except that the NGM-lite media (US Biological) where worms grew  
309 was supplemented with NaCl (305 mM) from the start and for 50 generations (4 replicate  
310 populations; Supplementary Information, Table S1). For the gradual regime plates were  
311 supplemented with increasing concentrations of NaCl from 33 mM at generation 1 to 305  
312 mM NaCl at generation 35 and onwards until generation 50 (7 replicate populations). A  
313 control regime was maintained in the ancestral environmental conditions without any salt  
314 supplement (3 replicates).

315

316 **Experimental evolution at different population sizes**

317 All 7 replicate populations from the gradual regime at generation 35 were revived  
318 from frozen stocks, expanded in numbers for two generations, and then split into two  
319 regimes: large population sizes of  $N=10^4$  and small population sizes of  $2 \cdot 10^3$ . From each of  
320 the seven gradual populations at generation 35, one replicate was maintained at large  
321 population sizes and three replicates were maintained at small population sizes. All  
322 populations were kept at constant 305 mM NaCl for 30 generations. Over  $10^3$  L1s were  
323 collected per population at generation 15 and 30, for pool-genotyping.

324

325 **Fitness assays**

326 The ancestral population (before salt adaptation) was thawed from frozen stocks and  
327 individuals reared for two generations at 25 mM before they were exposed to the three  
328 assay NaCl treatments (Fig. 3B). On the third generation, five Petri dishes per NaCl  
329 treatment were seeded with  $10^3$  L1s per plate. These five plates constituted one technical  
330 replicate, and there were four of these for each salt treatment. After 66 h, individuals were  
331 harvested and exposed to a 1 M KOH:5% NaOCl solution (to which only embryos survive).  
332 After 16 h, debris was removed and the total number of live L1s in each tube was estimated  
333 by scoring the number of L1s. For analysis, the per-capita L1-to-L1 growth rate values  
334 were linearly modelled in R (R Development Core Team 2015):  $\log(\text{growth\_rate}) \sim$   
335  $\text{salt\_treatment}$ . Least-square estimates were obtained using the R package *lsmeans*  
336 (Lenth 2015).



337           During experimental evolution in changing environments, one lineage swept  
338 through the sudden populations, while another lineage was initially sweeping though the  
339 gradual populations when they were at intermediate salt concentrations (Fig. 2B). From two  
340 gradual populations at generation 50, we derived in (Noble et al. In Press) 100 lines which  
341 were whole-genome sequenced. Of these, we identified lines L28 and L11 as  
342 representatives of the lineages predicted to explain the experimental population dynamics.  
343 For them, fitness assays were conducted as for the ancestral population, for two full  
344 generations (Fig. 3BC), over three blocks (defined by when L28 and L11 were revived  
345 from frozen stocks). For analysis, we used a mixed effects model (Bates et al. 2015) via the  
346 R formula: `log(growth_rate)~salt_treatment * line + assay_generation*line +`  
347 `(1|block)`. To estimate the expected selection coefficient of L28 relative to L11 we used  
348 *lsmeans* formulation: `pairwise ~ line | salt_treatment`.

349           L28 and L11 were also assayed in head-to-head competitions (Fig. 3C). They were  
350 thawed from frozen stocks and reared for two generations at 25 mM NaCl before they were  
351 set up at three NaCl concentrations: 25 mM, 225 mM and 305 mM. On the third generation,  
352 L1 larvae from the two lineages were mixed in 1:1 ratio, at a density of  $10^3$  L1s in each of  
353 two Petri dishes per replicate assay. Each replicate assay was maintained for two  
354 generations. At both the assay generations, L1 samples were collected for pool-genotyping  
355 of single nucleotide polymorphisms (SNPs). Assays were performed in three blocks, with 3  
356 replicate populations per salt concentration in each of two blocks, and 4 replicate  
357 populations in the third block. The data for analysis was based on the L28 and L11 SNP  
358 frequency values obtained after doing calibration curves where the ratio of both lines was  
359 known. For analysis, the estimated frequencies for L28 were forced to be in the interval

360 (0.005, 0.995). To estimate the relative selection coefficients we again used a mixed effects  
361 model:  $\log(\text{Odds\_Ratio\_L28}) \sim \text{salt\_treatment} * \text{assay\_generation} +$   
362  $(1|\text{Techn\_replicate})$ .

363

## 364 **Genotyping**

365 Individual L4 genomic DNA was prepared with the ZyGEM prepGEM™ Insect  
366 kit following (Chelo and Teotónio 2013). A total of 925 biallelic SNPs across the genome  
367 were assayed by iPlex Sequenom™ MALDI-TOF methods (Bradic et al. 2011). We chose  
368 the SNPs that we knew were segregating in the lab-adapted population (Noble et al. In  
369 Press). Due to the limited amount of genomic DNA, each individual was assayed for two of  
370 the six *C. elegans* chromosomes, each pair of chromosomes being referred to as a region  
371 (chromosomes I and II: region 1; III and IV: region 2; V and VI: region 3). For genotyping,  
372 larvae at the L4 (immature) stage: 64 larvae per region, from the ancestral M00; from each  
373 of the evolved populations (generations 10, 35 and 50), 16 L4s were sampled per region.  
374 Briefly, quality control was based on discarding SNPs with a high frequency of  
375 heterozygous calls, SNPs with a high frequency of genotyping failures (> 30%), and  
376 individuals in which many SNPs failed genotyping (> 25%). The 761 SNPs that passed  
377 quality control were imputed into chromosome-wide haplotypes using fastPHASE (Scheet  
378 and Stephens 2006). These SNPs were evenly spaced at an average of 0.30-0.38 cM,  
379 according to the genetic distance of (Rockman and Kruglyak 2009). Number of individuals  
380 per population, after quality control, can be found in Fig. S1B.

381 Genomic DNA from pooled samples was prepared using the Qiagen Blood and  
382 Tissue kit, and genotyped for 84 SNPs in chromosomes I, IV and V, using the iPlex

383 Sequenom methods in 3 technical replicates for each SNP assay. In parallel, pooled gDNA  
384 was prepared to calibrate SNP L28 allele frequencies when mixed with L11 or the ancestor  
385 population at several known proportions (8-14 technical replicates each). After quality  
386 control, we retained 29 SNPs, 18 of which differentiating L28 and L11 (Fig. 3D). We  
387 interpolated expected L28 frequencies from the calibration curves, using Levenberg-  
388 Marquardt algorithm in R package *minpack.lm* (Elzhov et al. 2016). For the principal  
389 component analysis of the matrix containing the frequency of the alternative alleles in each  
390 sample (Fig. 4), the function `prcomp` in R was used.

391

## 392 **Fitness reaction norms**

393 We assume an effectively asexual population genetics model for a haploid  
394 organism, ignoring segregation within loci and recombination among loci. The model also  
395 considers deterministic environmental and population dynamics, discrete non-overlapping  
396 generations and viability selection, with the only environmentally-relevant variable being  
397 the NaCl concentration. We assume an infinite population size, such that any given lineage  
398 never goes extinct (although the frequency may become very small), that there are no  
399 density- or frequency-dependencies, and that trans-generational effects are absent.

400 A population is composed of  $G$  lineages, such that the frequency of the  $k$ -th lineage  
401 in generation  $t + 1$ , denoted by  $g_k^{(t+1)}$ , is given by:

$$402 \quad g_k^{(t+1)} \propto \lambda_k(x(t+1)) g_k^{(t)} \quad [1]$$

403 where  $x(t)$  is the environment value faced in generation  $t$ , and  $\lambda_k(x)$  the expected number  
404 of live offspring produced by lineage  $k$  when faced with the environment  $x$ . In this way, the  
405 function  $\lambda_k(x)$  corresponds to the fitness reaction norm for lineage  $k$ .

406 Following the setup used for genotyping, the genome is divided into  $L$  non-  
407 overlapping regions, and we refer to the haplotype in a region as a region-wide haplotype  
408 (RWH). A “lineage”  $k$  is described by a tuple  $S_k$ , indicating the RWHs in each region, such  
409 that  $S_k = (l_{k,1}, l_{k,2}, \dots, l_{k,L})$ . We assume that the fitness reaction norm of a lineage is an  
410 additive function of the fitness reaction norm of the RWHs in that lineage:

$$411 \quad \xi_k(x) = \log(\lambda_k(x)) = \log(\lambda(x | \Theta, S_k)) = \sum_{l \in S_k} f(x | \theta_l), f(x | \theta_l) \in \mathbb{R} \quad [2]$$

412 where  $\Theta$  is a vector of parameters for all the region-wide haplotypes,  $\theta_l$  the parameters for  
413 RWH  $l$ , and  $f(x | \theta_l)$  the parametric function describing the fitness reaction norm for a  
414 single RWH. We considered  $f(x | \theta_l)$  to be a linear ( $f(x | \theta_l) = a_l x + b_l$ , such that  $\theta_l =$   
415  $(a_l, b_l)$ ) or quadratic function ( $f(x | \theta_l) = a_l x^2 + b_l x + c_l$ , such that  $\theta_l = (a_l, b_l, c_l)$ ) of  
416 the environmental value  $x$ .

417 Given genotyping and/or fitness data at  $H$  time-points plus the ancestral, we  
418 consider distinct epochs of the experimental evolution, evaluated at generations  
419  $T_0, T_1, \dots, T_H$  (such that  $T_0 = 0, T_1 = 10, T_2 = 35$  and  $T_3 = 50$ ; Fig. 1B). To denote the  
420 epoch to which a certain variable corresponds, a superscript inside square brackets is used.  
421 For a single population, the frequency of lineage  $k$  in epoch  $h$ , denoted by  $g_k^{[h]}$ , follows  
422 from the frequencies of the lineages in the previous epochs:

$$423 \quad g_k^{[h]} \propto \exp\left(\sum_{t=1+T_{h-1}}^{T_h} \xi_k(x(t))\right) g_k^{[h-1]}, h = 1, 2, \dots, H \quad [3]$$

424 where  $x(t)$  is the environment faced in generation  $t$ . The ancestral population, consisting of  
425  $G$  lineages, is described by two variables:  $A = (S_1, S_2, \dots, S_G)$ , corresponding to the RWHs  
426 present in each lineage; and  $g^{[0]} = (g_1^{[0]}, g_2^{[0]}, \dots, g_G^{[0]})$ , specifying the frequency of each  
427 lineage (such that  $\sum_{k=1}^G g_k^{[0]} = 1$ ).

428

## 429 Inference

430 For inferring the lineage fitness reaction norms,  $\lambda_k(x)$ , we consider that  $A$  and  $g^{[0]}$   
431 are known. Since this is not the case in the analysis of the experimental data, we sample the  
432 pair  $(A, g^{[0]})$ , given the experimental data, and then estimate the RWH parameters  $\Theta$ ,  
433 repeating these two steps multiple times (sections 1.7.6 and 1.7.7 of the Supporting  
434 Information).

435 Under the population genetics model used, all replicate populations within a single  
436 evolutionary regime  $c$  have the same dynamics of the lineage frequencies  $g_k^{[h]}$ . Let  $X_c =$   
437  $(X_c^{[1]}, X_c^{[2]}, \dots, X_c^{[H]})$  denote the sequence of environmental values in regime  $c$ , where  
438  $X_c^{[h]} = (x(t_1^{[h]}), x(t_2^{[h]}), \dots, x(t_{T_h - T_{h-1}}^{[h]}))$ ,  $t_i^{[h]} = i + T_{h-1}$ . Inference is framed in a  
439 maximum likelihood context, with contributions from each evolutionary regime, given the  
440 fitness and genotyping data. We consider without loss of generality that fitness and  
441 genotyping data are available for all epochs  $T_0, T_1, \dots, T_H$  for each regime. The case in  
442 which data is available only for certain epochs is treated by evaluating the corresponding  
443 likelihood function only for those epochs. The Supporting Information details how the

444 input data, at the level of the replicate populations, is converted to that at the level of each  
445 regime.

446 Let  $W_c = (W_{c,1}, W_{c,2}, \dots, W_{c,N_E})$  denote the fitness data on regime  $c$ , with  $N_E$  assay  
447 environments, with  $x_m$  being the environmental value, and  $\phi_{c,m}^{[h]}$  the observed population-  
448 averaged fitness value of a population from regime  $c$  in epoch  $h$  in the  $m$ -th assay  
449 environment. We assume a log-normal model for noise in the observed values  $\phi_{c,m}^{[h]}$ . The  
450 log-likelihood for the RWH parameter vector  $\Theta$  given the fitness data on regime  $c$  is then:

$$451 \quad L_W(\Theta | W_c, X_c, A, g^{[0]}) \propto -\sum_{h=0}^H \sum_{m=1}^{N_E} \log^2 \left( \frac{1}{\phi_{c,m}^{[h]}} \sum_{k=1}^G \lambda_k(x_m) g_k^{[h]} \right) \quad [4]$$

452 Let  $D_c = (D_c^{[1]}, D_c^{[2]}, \dots, D_c^{[H]})$  be the genotyping data on regime (note that it does  
453 not include the data on the ancestral), such that  $D_c^{[h]} = (n_{c,l_1}^{[h]}, n_{c,l_2}^{[h]}, \dots, n_{c,l_M}^{[h]})$ , where  $n_{c,l}^{[h]}$  is  
454 the number of copies of RWH  $l$  that were observed in epoch  $h$  in regime  $c$ . Then, the log-  
455 likelihood given the genotyping data on regime  $c$  is given by:

$$456 \quad L_D(\Theta | D_c, X_c, A, g^{[0]}) \propto \sum_{h=1}^H \sum_l n_{c,l}^{[h]} \log \left( \sum_{k=1}^G \mathbb{I}(l, S_k) g_k^{[h]} \right) \quad [5]$$

457 where  $\mathbb{I}(l, S_k)$  is an indicator function, equal to 1 if lineage  $k$  has RWH  $l$ , or equal to 0  
458 otherwise.

459 Considering all evolutionary regimes  $C$ , the log-likelihood is then obtained by  
460 combining equations [4] and [5]:

$$461 \quad \sum_{c \in C} L_W(\Theta | W_c, X_c, A, g^{[0]}) + L_D(\Theta | D_c, X_c, A, g^{[0]}) \quad [6]$$

462 Model fitting is then performed by maximizing equation [6], using a gradient-based  
463 optimization algorithm, starting from random initial conditions.

464

## 465 **Acknowledgments**

466 We thank J. Costa, A. Crist, H. Gendrot and I. Theologidis for support with nematode  
467 handling and sample preparation, L. Noble for help with the genomic data analysis, and the  
468 Center for Scientific Computing from the CNSI, MRL, at UC Santa Barbara, an NSF  
469 MRSEC (DMR-1121053) and NSF CNS-0960316 supported facility, for computation. We  
470 thank R. Gomulkiewicz, J. Hermisson, M.-A. Félix, S. Matuszewski and L. Noble for  
471 discussion. S.D. is a fellow of the Labex MemoLife (ANR-10-LBX-54 MEMO LIFE and  
472 ANR-IDEX-0001-02-PSL). Financial support from the National Science Foundation (EF-  
473 1137835) to S.R.P., the Human Frontiers Science Program (RGP0045/2010), the European  
474 Research Council (FP7/2007-2013/243285) and Agence Nationale de la Recherche (ANR-  
475 14-ACHN-0032-01) to H.T. All data and code for analysis will be deposited in public  
476 repositories.

477

478

## 479 **References**

480 Aggarwal, D. D., E. Rashkovetsky, P. Michalak, I. Cohen, Y. Ronin, D. Zhou, G. G. Haddad, and A. B.  
481 Korol. 2015. Experimental evolution of recombination and crossover interference in  
482 *Drosophila* caused by directional selection for stress-related traits. *BMC Biol* **13**:101.  
483 Bates, D., M. Maechler, B. Bolker, and S. Walker. 2015. Fitting Linear Mixed-Effects Models Using  
484 lme4. *Journal of Statistical Software* **67**:1-48.  
485 Bell, G. and A. Gonzalez. 2011. Adaptation and evolutionary rescue in metapopulations  
486 experiencing environmental deterioration. *Science* **332**:1327-1330.  
487 Bradic, M., J. Costa, and I. M. Chelo. 2011. Genotyping with Sequenom. *in* V. Orgogozo and M.  
488 Rockman, editors. *Molecular Methods for Evolutionary Genetics*. Humana Press, New  
489 York.

- 490 Charmantier, A., R. H. McCleery, L. R. Cole, C. Perrins, L. E. B. Kruuk, and B. C. Sheldon. 2008.  
491 Adaptive phenotypic plasticity in response to climate change in a wild bird population.  
492 *Science* **320**:800-803.
- 493 Chelo, I. M., J. Nédli, I. Gordo, and H. Teotónio. 2013. An experimental test on the probability of  
494 extinction of new genetic variants. *Nature Communications* **4**:10.1038/ncomms3417.
- 495 Chelo, I. M. and H. Teotónio. 2013. The opportunity for balancing selection in experimental  
496 populations of *Caenorhabditis elegans*. *Evolution* **67**:142-156.
- 497 Chevin, L. M., R. Lande, and G. M. Mace. 2010. Adaptation, plasticity, and extinction in a changing  
498 environment: towards a predictive theory. *PLoS Biol* **8**:e1000357.
- 499 Collins, S. and J. de Meaux. 2009. Adaptation to different rates of environmental change in  
500 *Chlamydomonas*. *Evolution* **63**:2952-2965.
- 501 Crow, J. F. and M. Kimura. 1970. *An Introduction to Population Genetics Theory*. Harper & Row,  
502 Publishers, New York.
- 503 Elzhov, T. V., K. M. Mullen, A.-N. Spiess, and B. Bolker. 2016. minipack.lm: R interface to the  
504 Levenberg-Marquardt nonlinear least-squares algorithm found in MINPACK, plus support  
505 for bounds.
- 506 Fisher, R. 1930. *The Genetical Theory of Natural Selection*. Oxford University Press, Oxford.
- 507 Gomulkiewicz, R. and M. Kirkpatrick. 1992. Quantitative genetics and the evolution of reaction  
508 norms. *Evolution* **46**:390-411.
- 509 Gonzalez, A. and G. Bell. 2013. Evolutionary rescue and adaptation to abrupt environmental  
510 change depends upon the history of stress. *Philos Trans R Soc Lond B Biol Sci*  
511 **368**:20120079.
- 512 Gorter, F. A., M. G. M. Aarts, B. J. Zwaan, and J. A. de Visser. 2015. Dynamics of adaptation in  
513 experimental yeast populations exposed to gradual and abrupt change in heavy metal  
514 concentration. *Am Nat* **187**:110-119.
- 515 Gresham, D., V. M. Boer, A. Caudy, N. Ziv, N. J. Brandt, J. D. Storey, and D. Botstein. 2011. System-  
516 level analysis of genes and functions affecting survival during nutrient starvation in  
517 *Saccharomyces cerevisiae*. *Genetics* **187**:299-317.
- 518 Hill, W. G. 1982. Rates of change in quantitative traits from fixation of new mutations. *Proc Natl*  
519 *Acad Sci U S A* **79**:142-145.
- 520 Illingworth, C. J., A. Fisher, and V. Mustonen. 2014. Identifying selection in the within-host  
521 evolution of influenza using viral sequence data. *PLoS Computational Biology*  
522 **10**:e1003755.
- 523 Kopp, M. and J. Hermisson. 2009. The genetic basis of phenotypic adaptation I: fixation of  
524 beneficial mutations in the moving optimum model. *Genetics* **182**:233-249.
- 525 Kryazhimskiy, S., D. P. Rice, E. R. Jerison, and M. M. Desai. 2014. Microbial evolution. Global  
526 epistasis makes adaptation predictable despite sequence-level stochasticity. *Science*  
527 **344**:1519-1522.
- 528 Lande, R. 2009. Adaptation to an extraordinary environment by evolution of phenotypic plasticity  
529 and genetic assimilation. *J Evol Biol* **22**:1435-1446.
- 530 Lenth, R. V. 2015. Ismeans: Least-Squares Means. R package version 2.20-23. [http://CRAN.R-](http://CRAN.R-project.org/package=lsmeans)  
531 [project.org/package=lsmeans](http://CRAN.R-project.org/package=lsmeans).
- 532 Lindsey, H. A., J. Gallie, S. Taylor, and B. Kerr. 2013. Evolutionary rescue from extinction is  
533 contingent on a lower rate of environmental change. *Nature* **494**:463-467.
- 534 Lynch, M. and R. Lande. 1993. Evolution and extinction in response to environmental change. *in* P.  
535 Kareiva, J. G. Kingsolver, and R. B. Huey, editors. *Biotic Interactions and Global Change*.  
536 Sinauer, Sunderland, MA.



- 537 Matuszewski, S., J. Hermisson, and M. Kopp. 2015. Catch me if you can: adaptation from standing  
538 genetic variation to a moving phenotypic optimum. *Genetics* **200**:1255–1274.
- 539 Noble, L., I. M. Chelo, T. Guzella, B. Afonso, D. Riccardi, P. Ammerman, A. Pino-Querido, S.  
540 Carvalho, A. Crist, A. Dayarian, B. Shraiman, M. Rockman, and H. Teotónio. In Press.  
541 Polygenicity and epistasis underlie fitness-proximal traits in the *Caenorhabditis elegans*  
542 multiparental experimental evolution (CeMEE) panel. *Genetics*; Preprint at  
543 BioRxiv:doi:10.1101/120865.
- 544 Perron, G. G., A. Gonzalez, and A. Buckling. 2008. The rate of environmental change drives  
545 adaptation to an antibiotic sink. *J Evol Biol* **21**:1724-1731.
- 546 R Development Core Team. 2015. R: A language and environment for statistical computing. R  
547 Foundation for Statistical Computing, Vienna, Austria.
- 548 Remold, S. K. and R. E. Lenski. 2004. Pervasive joint influence of epistasis and plasticity on  
549 mutational effects in *Escherichia coli*. *Nat Genet* **36**:423-426.
- 550 Rockman, M. V. and L. Kruglyak. 2009. Recombinational landscape and population genomics of  
551 *Caenorhabditis elegans*. *PLoS Genet* **5**:e1000419.
- 552 Scheet, P. and M. Stephens. 2006. A fast and flexible statistical model for large-scale population  
553 genotype data: applications to inferring missing genotypes and haplotypic phase. *Am J*  
554 *Hum Genet* **78**:629-644.
- 555 Stocker, T. F., D. Qin, G.-K. Plattner, L.V. Alexander, S.K. Allen, N.L. Bindoff, F.-M. Bréon, J.A.  
556 Church, U. Cubasch, S. Emori, P. Forster, P. Friedlingstein, N. Gillett, J.M. Gregory, D.L.  
557 Hartmann, E. Jansen, B. Kirtman, R. Knutti, K. Krishna Kumar, P. Lemke, J. Marotzke, V.  
558 Masson-Delmotte, G.A. Meehl, I.I. Mokhov, S. Piao, V. Ramaswamy, D. Randall, M. Rhein,  
559 M. Rojas, C. Sabine, D. Shindell, L.D. Talley, D. G. Vaughan, and S.-P. Xie. 2013. Technical  
560 Summary. Chapter 02. In: *Climate Change 2013: The Physical Science Basis. Contribution*  
561 *of Working Group I to the Fifth Assessment Report of the Intergovernmental Panel on*  
562 *Climate Change*. Cambridge University Press, Cambridge.
- 563 Teotónio, H., S. Carvalho, D. Manoel, M. Roque, and I. M. Chelo. 2012. Evolution of outcrossing in  
564 experimental populations of *Caenorhabditis elegans*. *PLoS One* **7**:e35811.
- 565 Teotónio, H., S. Estes, P. Phillips, and C. F. Baer. 2017. Evolution experiments with *Caenorhabditis*  
566 *nematodes*. *Genetics* **206**:691-716.
- 567 Theologidis, I., I. M. Chelo, C. Goy, and H. Teotónio. 2014. Reproductive assurance drives  
568 transitions to self-fertilization in experimental *Caenorhabditis elegans*. *BMC Biol* **12**:93.
- 569 Walsh, B. and M. Lynch. 2014. Evolution and Selection of Quantitative Traits,  
570 [nitro.biosci.arizona.edu/zbook/NewVolume\\_2/newvol2.html](http://nitro.biosci.arizona.edu/zbook/NewVolume_2/newvol2.html).

571

572

573

574 **Figures**

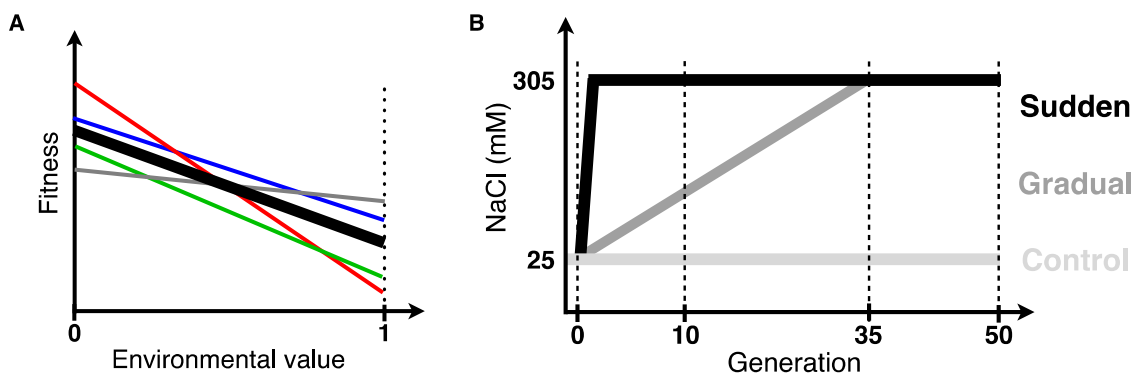

575

576 **Fig. 1.** Fitness reaction norms and experimental evolution design. (A) Heritable genotype-  
577 by-environment fitness variance implies that genotypes (colored lines) have different  
578 growth rates along the value of the environmental factor(s) considered; known as “fitness  
579 reaction norms”, “tolerance functions” or “Finley & Wilkinson regressions” (Chevin et al.  
580 2010, Walsh and Lynch 2014). Under density- and frequency-independent conditions, the  
581 relative difference of genotype growth rates to the average population growth rate (thick  
582 line) will determine the population genetic dynamics during evolution (Fisher 1930, Crow  
583 and Kimura 1970). Independently of their specific form, if there is crossing of fitness  
584 reaction norms particular genotypes will be favored at some environmental values while  
585 disfavored in others. For example, with a sudden change to an environmental value of 1  
586 (vertical dotted line), from an ancestral environment 0, selection will favor the grey  
587 genotype, while a gradual change will initially favor the red genotype, then the blue one  
588 and only at a later period the grey genotype. (B) A 140-generation lab-adapted *C. elegans*  
589 population with genetic diversity, reproducing only by selfing, was the ancestor for  
590 experimental evolution. In the sudden regime, 4 replicate populations were faced from the  
591 first generation onwards to 305 mM NaCl in their growth media (black line). In the gradual  
592 regime, 7 replicate populations were faced with an 8 mM NaCl increase each generation  
593 until generation 35, being then kept at 305 mM until generation 50 (dark grey). In the  
594 control regime, 3 replicate populations were kept at 25 mM NaCl, the conditions to which  
595 the ancestor was adapted to (light grey). Vertical dashed lines indicate the time points  
596 where individuals were genotyped at single nucleotide polymorphisms (SNPs) across the  
597 genome (see also Fig. S1).

598

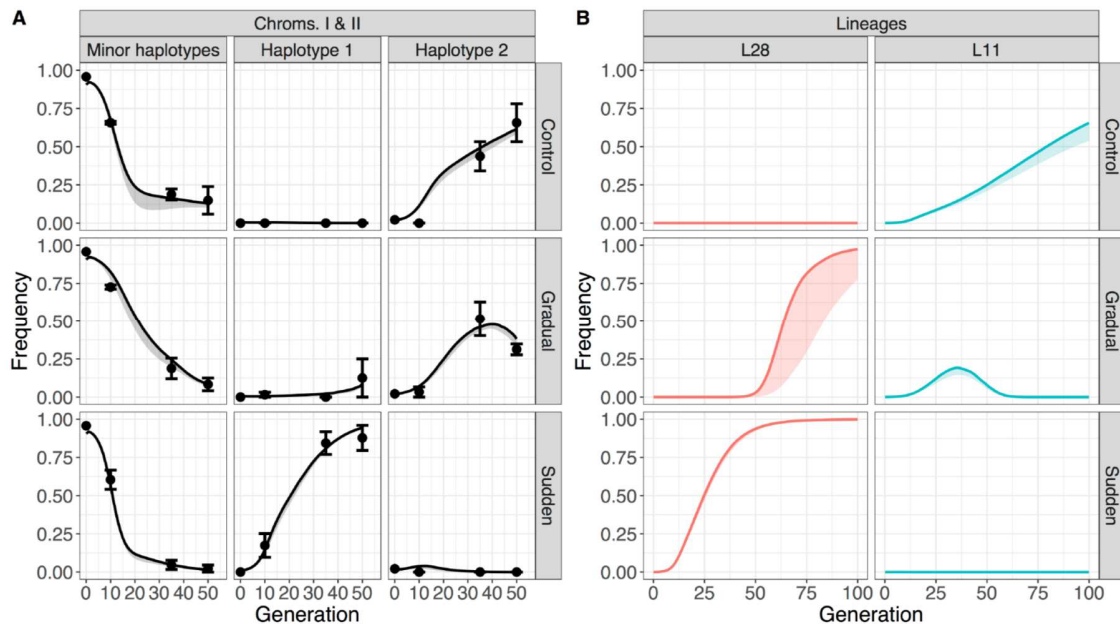

599

600 **Fig. 2.** Observed and predicted experimental population genetic dynamics. (A) Left  
 601 columns show that the majority of haplotypes observed for chromosomes I and II are  
 602 quickly selected against in all experimental evolution regimes (rows). Middle and right  
 603 columns show the two specific haplotypes in chromosomes I and II showing the greatest  
 604 frequency change. Summary statistics and details of the pre-processing of the data for  
 605 inference can be found in Figs. S2 and S3. Detailed results considering each replicate  
 606 population are shown in Fig. S4. Symbols and error bars are the mean and one standard  
 607 error of the observed haplotype frequencies among replicate populations. Line and shaded  
 608 grey area are the trajectories inferred by modeling linear fitness reaction norms. (B)  
 609 Inference results, evaluated over 100 generations (assuming that the gradual populations  
 610 would be kept at high salt after generation 35), for the two main lineages (L28 and L11 in  
 611 each column), assuming linear reaction norms. Detailed results for other lineages are shown  
 612 in Fig. S5. Shaded colors correspond to confidence intervals considering the estimates  
 613 obtained when sampling the ancestral population 20 times, with the line showing the  
 614 median. Fig. S6 shows similar results when quadratic fitness reaction norms, instead of  
 615 linear, are considered.  
 616

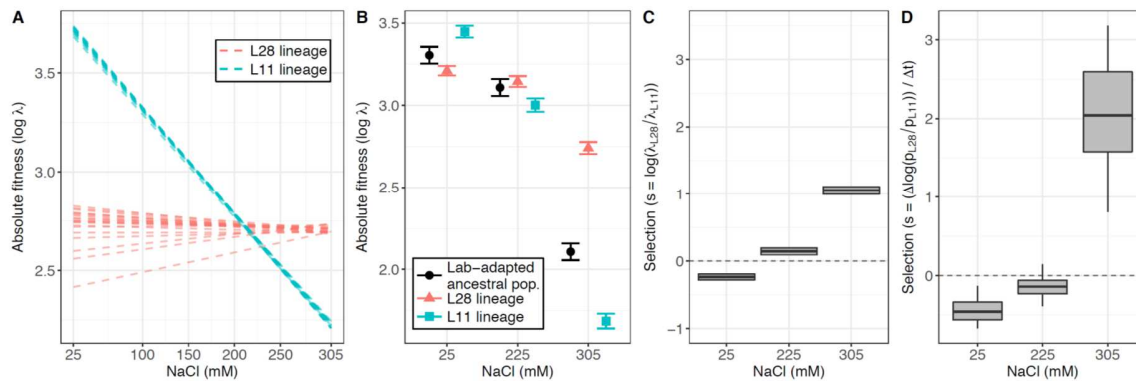

617

618 **Fig. 3.** Crossing of fitness reaction norms. (A) Predicted fitness reaction norms of the L28  
619 (red) and L11 (blue) lineages for 20 samples of the ancestral population (assuming linear  
620 reaction norms; see main text). (B) Absolute fitness of L28 and L11 lines, and the ancestor  
621 lab-adapted population at three salt concentrations (mean  $\pm$  SE). (C) From (B), estimates  
622 (mean  $\pm$  SE) of the expected relative fitness of L28 to L11 (selection coefficient) at three  
623 salt concentrations. (D) Similar to (C), but estimates from competitive fitness assays  
624 between L28 and L11. The two lineages were identified after genome-wide sequencing of  
625 100 lines derived from two gradual populations at generation 50 (Fig. S7 and Table S2).  
626 Estimates were obtained using pooled-genotyping data on 18 SNPs that differ in L28 and  
627 L11 (see Materials and Methods, and Fig. S8 for calibration curves).  
628

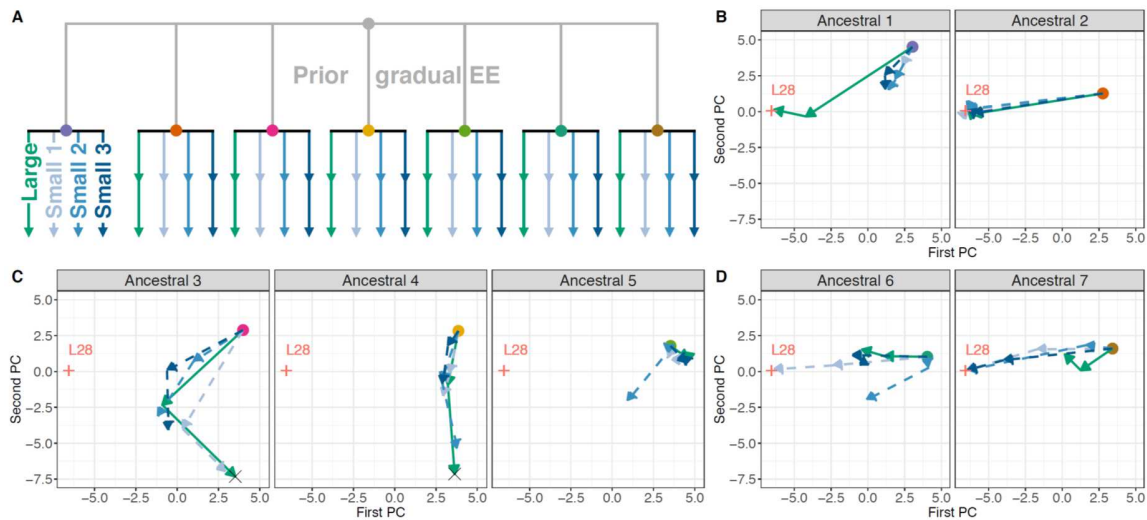

629

630 **Fig. 4.** Gradual evolution restricts future adaptation to high salt. (A) Experimental  
631 evolution design at different population sizes. Seven gradual population at generation 35  
632 become the ancestors (colored dots) for continued evolution in constant 305 mM NaCl for  
633 an extra 30 generations under large (green) and small (blue) population sizes. Populations  
634 were pool-genotyped after 15 and 30 generations. (B-D) Trajectories for the replicate  
635 populations under large and small population sizes, from the seven ancestor populations.  
636 These trajectories are based on principal component (PC) analysis of allele frequency data  
637 for 29 SNPs genotyped in pools of individuals, with the two first axis accounting for more  
638 than 70% of the variance (see also Fig. S9). Red crosses indicate the position of the L28  
639 lineage, while the other crosses position another lineage. Analysis of the probability of a  
640 sweep by L28 is shown in Fig. S10.
